# Supplementary material for: From Source to Tap: Tracking Microbial Diversity in a Riverbank Filtration-Based Drinking Water Supply System under Changing Hydrological Regimes
Source: MDPI journal article supplement (doi:10.3390/d15050621), 2023-05-02
Supplement: s1 [file s1]

Supplementary material to the article **From source to tap: tracking microbial diversity in a riverbank filtration based drinking water supply system under changing hydrological regimes**

Statistical tables

Table S1. Comparison of Danube water quality upstream and downstream from Budapest by Mann-Whitney U test with continuity correction. Marked tests in bold are significant at  $p < 0.05000$ .

| Variable              | Rank Sum NR | Rank SUM SR | U        | Z               | p-value         | Z               | p-value         | Valid N | Valid N |
|-----------------------|-------------|-------------|----------|-----------------|-----------------|-----------------|-----------------|---------|---------|
| Ammonium              | 7942,000    | 8348,000    | 3847,000 | -0,57934        | 0,562360        | -0,58444        | 0,558922        | 90      | 90      |
| Nitrite               | 8080,500    | 8209,500    | 3985,500 | -0,18310        | 0,854720        | -0,20929        | 0,834222        | 90      | 90      |
| Nitrate               | 7979,500    | 8310,500    | 3884,500 | -0,47206        | 0,636888        | -0,47245        | 0,636603        | 90      | 90      |
| Chloride              | 7850,000    | 8440,000    | 3755,000 | -0,84255        | 0,399482        | -0,84588        | 0,397619        | 90      | 90      |
| Sulphate              | 7403,500    | 8886,500    | 3308,500 | <b>-2,11996</b> | <b>0,034010</b> | <b>-2,12634</b> | <b>0,033476</b> | 90      | 90      |
| Turbidity             | 7877,500    | 8412,500    | 3782,500 | -0,76387        | 0,444945        | -0,76410        | 0,444807        | 90      | 90      |
| TOC                   | 7645,500    | 8644,500    | 3550,500 | -1,42761        | 0,153405        | -1,43016        | 0,152671        | 90      | 90      |
| DOC                   | 7660,000    | 8630,000    | 3565,000 | -1,38613        | 0,165709        | -1,38851        | 0,164982        | 90      | 90      |
| T                     | 7620,000    | 7605,000    | 3777,000 | 0,02107         | 0,983190        | 0,02107         | 0,983187        | 87      | 87      |
| pH                    | 6558,500    | 8666,500    | 2730,500 | <b>-3,17093</b> | <b>0,001520</b> | <b>-3,17124</b> | <b>0,001518</b> | 87      | 87      |
| Electric conductivity | 7327,500    | 7897,500    | 3499,500 | -0,85632        | 0,391823        | -0,85803        | 0,390876        | 87      | 87      |
| Redox potential       | 7433,000    | 7792,000    | 3605,000 | -0,53877        | 0,590044        | -0,53878        | 0,590040        | 87      | 87      |
| Iron                  | 7966,000    | 8324,000    | 3871,000 | -0,51068        | 0,609577        | -0,51087        | 0,609440        | 90      | 90      |
| Manganese             | 7681,000    | 8609,000    | 3586,000 | -1,32605        | 0,184825        | -1,32695        | 0,184526        | 90      | 90      |

Table S2. Comparison of Northern and Southern wells by Mann-Whitney U test with continuity correction. Marked tests in bold are significant at  $p < 0.05000$ .

| Variable              | Rank Sum NW | Rank SUM SW | U        | Z               | p-value         | Z               | p-value         | Valid N | Valid N |
|-----------------------|-------------|-------------|----------|-----------------|-----------------|-----------------|-----------------|---------|---------|
| Ammonium              | 10690,50    | 15415,50    | 3669,500 | <b>-5,6661</b>  | <b>0,000000</b> | <b>-7,2772</b>  | <b>0,000000</b> | 118     | 110     |
| Nitrite               | 12626,00    | 13480,00    | 5605,000 | -1,7772         | 0,075538        | <b>-4,1356</b>  | <b>0,000035</b> | 118     | 110     |
| Nitrate               | 19517,00    | 6589,00     | 484,000  | <b>12,0666</b>  | <b>0,000000</b> | <b>12,0699</b>  | <b>0,000000</b> | 118     | 110     |
| Chloride              | 15030,50    | 11075,50    | 4970,500 | <b>3,0521</b>   | <b>0,002273</b> | <b>3,0616</b>   | <b>0,002202</b> | 118     | 110     |
| Sulphate              | 10949,50    | 15156,50    | 3928,500 | <b>-5,1457</b>  | <b>0,000000</b> | <b>-5,1480</b>  | <b>0,000000</b> | 118     | 110     |
| Turbidity             | 8066,50     | 18039,50    | 1045,500 | <b>-10,9384</b> | <b>0,000000</b> | <b>-11,5337</b> | <b>0,000000</b> | 118     | 110     |
| TOC                   | 9598,00     | 16508,00    | 2577,000 | <b>-7,8612</b>  | <b>0,000000</b> | <b>-7,8860</b>  | <b>0,000000</b> | 118     | 110     |
| DOC                   | 9027,50     | 17078,50    | 2006,500 | <b>-9,0075</b>  | <b>0,000000</b> | <b>-9,0406</b>  | <b>0,000000</b> | 118     | 110     |
| T                     | 13422,00    | 12684,00    | 6401,000 | -0,1778         | 0,858865        | -0,1779         | 0,858827        | 118     | 110     |
| pH                    | 13297,50    | 12808,50    | 6276,500 | -0,4280         | 0,668672        | -0,4376         | 0,661677        | 118     | 110     |
| Electric conductivity | 12143,50    | 13962,50    | 5122,500 | <b>-2,7467</b>  | <b>0,006021</b> | <b>-2,7468</b>  | <b>0,006018</b> | 118     | 110     |
| Redox potential       | 18721,50    | 7384,50     | 1279,500 | <b>10,4682</b>  | <b>0,000000</b> | <b>10,4686</b>  | <b>0,000000</b> | 118     | 110     |
| Iron                  | 7760,00     | 18346,00    | 739,000  | <b>-11,5542</b> | <b>0,000000</b> | <b>-12,1098</b> | <b>0,000000</b> | 118     | 110     |
| Manganese             | 7043,50     | 18834,50    | 22,500   | <b>-12,9626</b> | <b>0,000000</b> | <b>-12,9854</b> | <b>0,000000</b> | 118     | 109     |

Table S3. Comparison of Danube water (SR) and well water (SW) quality by Mann-Whitney U test with continuity correction. Marked tests in bold are significant at  $p < 0.05000$ .

| Variable                 | Rank Sum<br>SR | Rank<br>SUM SW | U        | Z               | p-value         | Z               | p-value         | Valid N | Valid N |
|--------------------------|----------------|----------------|----------|-----------------|-----------------|-----------------|-----------------|---------|---------|
| Ammonium                 | 11164,50       | 8935,50        | 2830,500 | <b>5,2036</b>   | <b>0,000000</b> | <b>5,3581</b>   | <b>0,000000</b> | 90      | 110     |
| Nitrite                  | 10298,00       | 9802,00        | 3697,000 | <b>3,0758</b>   | <b>0,002100</b> | <b>4,0754</b>   | <b>0,000046</b> | 90      | 110     |
| Nitrate                  | 12570,00       | 7530,00        | 1425,000 | <b>8,6551</b>   | <b>0,000000</b> | <b>8,6567</b>   | <b>0,000000</b> | 90      | 110     |
| Chloride                 | 6829,50        | 13270,50       | 2734,500 | <b>-5,4394</b>  | <b>0,000000</b> | <b>-5,4547</b>  | <b>0,000000</b> | 90      | 110     |
| Sulphate                 | 4354,00        | 15746,00       | 259,000  | <b>-11,5185</b> | <b>0,000000</b> | <b>-11,5254</b> | <b>0,000000</b> | 90      | 110     |
| Turbidity                | 13633,50       | 6466,50        | 361,500  | <b>11,2667</b>  | <b>0,000000</b> | <b>11,2689</b>  | <b>0,000000</b> | 90      | 110     |
| TOC                      | 13594,50       | 6505,50        | 400,500  | <b>11,1710</b>  | <b>0,000000</b> | <b>11,1894</b>  | <b>0,000000</b> | 90      | 110     |
| DOC                      | 13642,50       | 6457,50        | 352,500  | <b>11,2888</b>  | <b>0,000000</b> | <b>11,3109</b>  | <b>0,000000</b> | 90      | 110     |
| T                        | 8171,50        | 11331,50       | 4343,500 | -1,1098         | 0,267091        | -1,1099         | 0,267042        | 87      | 110     |
| pH                       | 10111,00       | 9392,00        | 3287,000 | <b>3,7685</b>   | <b>0,000164</b> | <b>3,7843</b>   | <b>0,000154</b> | 87      | 110     |
| Electric<br>conductivity | 3828,00        | 15675,00       | 0,000    | <b>-12,0403</b> | <b>0,000000</b> | <b>-12,0426</b> | <b>0,000000</b> | 87      | 110     |
| Redox<br>potential       | 6083,50        | 13419,50       | 2255,500 | <b>-6,3643</b>  | <b>0,000000</b> | <b>-6,3644</b>  | <b>0,000000</b> | 87      | 110     |
| Iron                     | 9824,00        | 10276,00       | 4171,000 | 1,9118          | 0,055908        | 1,9123          | 0,055837        | 90      | 110     |
| Manganese                | 4415,00        | 15485,00       | 320,000  | <b>-11,3379</b> | <b>0,000000</b> | <b>-11,3397</b> | <b>0,000000</b> | 90      | 109     |

Table S4. List of OTUs corresponding to the numbering on Figure 2a.

| OTU<br>number | Domain     | Phylum           | Class                                | Order                                |
|---------------|------------|------------------|--------------------------------------|--------------------------------------|
| 1             | Unassigned | —                | —                                    | —                                    |
| 2             | Archaea    | Aenigmarchaeota  | Aenigmarchaeia                       | Aenigmarchaeales                     |
| 3             | Archaea    | Aenigmarchaeota  | Deep_Sea_Euryarchaeotic_Group (DSEG) | Deep_Sea_Euryarchaeotic_Group (DSEG) |
| 4             | Archaea    | Crenarchaeota    | Bathyarchaeia                        | Bathyarchaeia                        |
| 5             | Archaea    | Crenarchaeota    | Nitrososphaeria                      | —                                    |
| 6             | Archaea    | Crenarchaeota    | Nitrososphaeria                      | Marine_Benthic_Group_A               |
| 7             | Archaea    | Crenarchaeota    | Nitrososphaeria                      | Nitrosopumilales                     |
| 8             | Archaea    | Crenarchaeota    | Nitrososphaeria                      | Nitrosotaleales                      |
| 9             | Archaea    | Halobacterota    | Methanomicrobia                      | Methanomicrobiales                   |
| 10            | Archaea    | Halobacterota    | Methanosarcinia                      | Methanosarciniales                   |
| 11            | Bacteria   |                  |                                      |                                      |
| 12            | Archaea    | Micrarchaeota    | Micrarchaeia                         | Micrarchaeales                       |
| 13            | Archaea    | Nanoarchaeota    | Nanoarchaeia                         | Woesearchaeales                      |
| 14            | Archaea    | Thermoplasmatota | Thermoplasmata                       | Methanomassiliicoccales              |
| 15            | Bacteria   | —                | —                                    | —                                    |
| 16            | Bacteria   | Acidobacteriota  | —                                    | —                                    |
| 17            | Bacteria   | Acidobacteriota  | Acidobacteriae                       |                                      |
| 18            | Bacteria   | Acidobacteriota  | Acidobacteriae                       | Acidobacteriae                       |
| 19            | Bacteria   | Acidobacteriota  | Acidobacteriae                       | Bryobacterales                       |
| 20            | Bacteria   | Acidobacteriota  | Blastocatellia                       | 11-24                                |
| 21            | Bacteria   | Acidobacteriota  | Blastocatellia                       | Blastocatellales                     |
| 22            | Bacteria   | Acidobacteriota  | Blastocatellia                       | Elev-16S-573                         |
| 23            | Bacteria   | Acidobacteriota  | Holophagae                           | Holophagales                         |
| 24            | Bacteria   | Acidobacteriota  | Subgroup_22                          | Subgroup_22                          |
| 25            | Bacteria   | Acidobacteriota  | Subgroup_5                           | Subgroup_5                           |
| 26            | Bacteria   | Acidobacteriota  | Vicinamibacteria                     | Subgroup_17                          |

| OTU<br>number | Domain   | Phylum           | Class             | Order                           |
|---------------|----------|------------------|-------------------|---------------------------------|
| 27            | Bacteria | Acidobacteriota  | Vicinamibacteria  | Vicinamibacterales              |
| 28            | Bacteria | Actinobacteriota | Acidimicrobiia    | Microtrichales                  |
| 29            | Bacteria | Actinobacteriota | Actinobacteria    |                                 |
| 30            | Bacteria | Actinobacteriota | Actinobacteria    | Corynebacterales                |
| 31            | Bacteria | Actinobacteriota | Actinobacteria    | Frankiales                      |
| 32            | Bacteria | Actinobacteriota | Actinobacteria    | Micrococcales                   |
| 33            | Bacteria | Actinobacteriota | Actinobacteria    | PeM15                           |
| 34            | Bacteria | Actinobacteriota | Actinobacteria    | Propionibacterales              |
| 35            | Bacteria | Actinobacteriota | Actinobacteria    | uncultured                      |
| 36            | Bacteria | Actinobacteriota | Thermoleophilia   | Gaiellales                      |
| 37            | Bacteria | Armatimonadota   | Fimbriimonadia    | Fimbriimonadales                |
| 38            | Bacteria | Bacteroidota     | Bacteroidia       | Bacteroidales                   |
| 39            | Bacteria | Bacteroidota     | Bacteroidia       | Chitinophagales                 |
| 40            | Bacteria | Bacteroidota     | Bacteroidia       | Cytophagales                    |
| 41            | Bacteria | Bacteroidota     | Bacteroidia       | Flavobacterales                 |
| 42            | Bacteria | Bacteroidota     | Bacteroidia       | Sphingobacterales               |
| 43            | Bacteria | Bacteroidota     | Ignavibacteria    | Ignavibacterales                |
| 44            | Bacteria | Bacteroidota     | Kapabacteria      | Kapabacterales                  |
| 45            | Bacteria | Bacteroidota     | Kryptonia         | Kryptoniales                    |
| 46            | Bacteria | Bacteroidota     | SJA-28            | SJA-28                          |
| 47            | Bacteria | Bdellovibrionota | Bdellovibrionia   | Bacteriovoracales               |
| 48            | Bacteria | Bdellovibrionota | Bdellovibrionia   | Bdellovibrionales               |
| 49            | Bacteria | Bdellovibrionota | Oligoflexia       | 0319-6G20                       |
| 50            | Bacteria | Bdellovibrionota | Oligoflexia       | Silvanigrellales                |
| 51            | Bacteria | Campilobacterota | Campylobacteria   | Campylobacterales               |
| 52            | Bacteria | Chloroflexi      | Anaerolineae      | Anaerolineales                  |
| 53            | Bacteria | Chloroflexi      | Anaerolineae      | RBG-13-54-9                     |
| 54            | Bacteria | Chloroflexi      | Chloroflexia      | Chloroflexales                  |
| 55            | Bacteria | Chloroflexi      | Dehalococcoidia   | —                               |
| 56            | Bacteria | Chloroflexi      | Dehalococcoidia   | 661239                          |
| 57            | Bacteria | Chloroflexi      | Dehalococcoidia   | S085                            |
| 58            | Bacteria | Chloroflexi      | Dehalococcoidia   | SAR202_clade                    |
| 59            | Bacteria | Chloroflexi      | SL56_marine_group | SL56_marine_group               |
| 60            | Bacteria | Cyanobacteria    | Cyanobacteriia    | Cyanobacterales                 |
| 61            | Bacteria | Cyanobacteria    | Cyanobacteriia    | Leptolyngbyales                 |
| 62            | Bacteria | Cyanobacteria    | Cyanobacteriia    | Oxyphotobacteria_Incertae_Sedis |
| 63            | Bacteria | Cyanobacteria    | Cyanobacteriia    | Phormidesmiales                 |
| 64            | Bacteria | Cyanobacteria    | Cyanobacteriia    | Pseudanabaenales                |
| 65            | Bacteria | Cyanobacteria    | Cyanobacteriia    | SepB-3                          |
| 66            | Bacteria | Cyanobacteria    | Cyanobacteriia    | Synechococcales                 |
| 67            | Bacteria | Cyanobacteria    | Sericytochromatia | Sericytochromatia               |
| 68            | Bacteria | Cyanobacteria    | Vampirivibrionia  | Obscuribacterales               |
| 69            | Bacteria | Cyanobacteria    | Vampirivibrionia  | Vampiropvibrionales             |
| 70            | Bacteria | Deinococcota     | Deinococci        | Deinococcales                   |
| 71            | Bacteria | Desulfobacterota | Desulfuromonadia  | —                               |
| 72            | Bacteria | Desulfobacterota | Desulfuromonadia  | Desulfuromonadia                |
| 73            | Bacteria | Desulfobacterota | Desulfuromonadia  | Geobacterales                   |
| 74            | Bacteria | Desulfobacterota | Desulfuromonadia  | PB19                            |
| 75            | Bacteria | Desulfobacterota | Syntrophia        | Syntrophales                    |

| OTU<br>number | Domain   | Phylum              | Class                  | Order                               |
|---------------|----------|---------------------|------------------------|-------------------------------------|
| 76            | Bacteria | DTB120              | DTB120                 | DTB120                              |
| 77            | Bacteria | Elusimicrobiota     | Elusimicrobia          | Lineage_IV                          |
| 78            | Bacteria | Elusimicrobiota     | Lineage_IIC            | Lineage_IIC                         |
| 79            | Bacteria | Firmicutes          | Bacilli                | Bacillales                          |
| 80            | Bacteria | Firmicutes          | Bacilli                | Exiguobacterales                    |
| 81            | Bacteria | Firmicutes          | Bacilli                | Lactobacillales                     |
| 82            | Bacteria | Firmicutes          | Bacilli                | Staphylococcales                    |
| 83            | Bacteria | Firmicutes          | Clostridia             | Clostridiales                       |
| 84            | Bacteria | Firmicutes          | Clostridia             | Peptostreptococcales-Tissierellales |
| 85            | Bacteria | Fusobacteriota      | Fusobacteriia          | Fusobacteriales                     |
| 86            | Bacteria | Gemmatimonadot<br>a | Gemmatimonadetes       | Gemmatimonadales                    |
| 87            | Bacteria | Latescibacterota    | Latescibacterota       | Latescibacterota                    |
| 88            | Bacteria | MBNT15              | MBNT15                 | MBNT15                              |
| 89            | Bacteria | Methylomirabilota   | Methylomirabilia       | Methylomirabilales                  |
| 90            | Bacteria | Methylomirabilota   | Methylomirabilia       | Rokubacteriales                     |
| 91            | Bacteria | Myxococcota         | bacteriap25            | bacteriap25                         |
| 92            | Bacteria | Myxococcota         | Myxococcia             | Myxococcales                        |
| 93            | Bacteria | Myxococcota         | Polyangia              | Blfdi19                             |
| 94            | Bacteria | Myxococcota         | Polyangia              | Haliangiales                        |
| 95            | Bacteria | Myxococcota         | Polyangia              | Polyangiales                        |
| 96            | Bacteria | NB1-j               | NB1-j                  | NB1-j                               |
| 97            | Bacteria | Nitrospirota        | —                      | —                                   |
| 98            | Bacteria | Nitrospirota        | 4-29-1                 | 4-29-1                              |
| 99            | Bacteria | Nitrospirota        | Leptospirillia         | Leptospirillales                    |
| 100           | Bacteria | Nitrospirota        | Nitrospira             | Nitrospirales                       |
| 101           | Bacteria | Nitrospirota        | Thermodesulfovibrionia | uncultured                          |
| 102           | Bacteria | Patescibacteria     | Berkelbacteria         | Berkelbacteria                      |
| 103           | Bacteria | Patescibacteria     | Gracilibacteria        | Absconditabacteriales_(SR1)         |
| 104           | Bacteria | Patescibacteria     | Gracilibacteria        | Candidatus_Peribacteria             |
| 105           | Bacteria | Patescibacteria     | Gracilibacteria        | Gracilibacteria                     |
| 106           | Bacteria | Patescibacteria     | Kazania                | Kazania                             |
| 107           | Bacteria | Patescibacteria     | Parcubacteria          | —                                   |
| 108           | Bacteria | Patescibacteria     | Parcubacteria          | Candidatus_Adlerbacteria            |
| 109           | Bacteria | Patescibacteria     | Parcubacteria          | Candidatus_Azambacteria             |
| 110           | Bacteria | Patescibacteria     | Parcubacteria          | UBA9983                             |
| 111           | Bacteria | Planctomycetota     | Phycisphaerae          | CCM11a                              |
| 112           | Bacteria | Planctomycetota     | Pla4_lineage           | Pla4_lineage                        |
| 113           | Bacteria | Proteobacteria      | Alphaproteobacteria    | Azospirillales                      |
| 114           | Bacteria | Patescibacteria     | Parcubacteria          |                                     |
| 115           | Bacteria | Patescibacteria     | Parcubacteria          | Parcubacteria                       |
| 116           | Bacteria | Patescibacteria     | Saccharimonadia        | Saccharimonadales                   |
| 117           | Bacteria | Proteobacteria      | Alphaproteobacteria    |                                     |
| 118           | Bacteria | Proteobacteria      | Alphaproteobacteria    | Acetobacterales                     |
| 119           | Bacteria | Proteobacteria      | Alphaproteobacteria    | Caulobacterales                     |
| 120           | Bacteria | Proteobacteria      | Alphaproteobacteria    | Defluviicoccales                    |
| 121           | Bacteria | Proteobacteria      | Alphaproteobacteria    | Dongiales                           |
| 122           | Bacteria | Proteobacteria      | Alphaproteobacteria    | Holospirales                        |
| 123           | Bacteria | Proteobacteria      | Alphaproteobacteria    | Micropepsales                       |

| OTU<br>number | Domain   | Phylum            | Class               | Order                              |
|---------------|----------|-------------------|---------------------|------------------------------------|
| 124           | Bacteria | Proteobacteria    | Alphaproteobacteria | Paracaedibacterales                |
| 125           | Bacteria | Proteobacteria    | Alphaproteobacteria | Reyranellales                      |
| 126           | Bacteria | Proteobacteria    | Alphaproteobacteria | Rhizobiales                        |
| 127           | Bacteria | Proteobacteria    | Alphaproteobacteria | Rhodobacterales                    |
| 128           | Bacteria | Proteobacteria    | Alphaproteobacteria | Rhodospirillales                   |
| 129           | Bacteria | Proteobacteria    | Alphaproteobacteria | Rickettsiales                      |
| 130           | Bacteria | Proteobacteria    | Alphaproteobacteria | SAR11_clade                        |
| 131           | Bacteria | Proteobacteria    | Alphaproteobacteria | Sphingomonadales                   |
| 132           | Bacteria | Proteobacteria    | Alphaproteobacteria | Zavarziniales                      |
| 133           | Bacteria | Proteobacteria    | Alphaproteobacteria | uncultured                         |
| 134           | Bacteria | Proteobacteria    | Gammaproteobacteria | Acidiferrobacterales               |
| 135           | Bacteria | Proteobacteria    | Gammaproteobacteria |                                    |
| 136           | Bacteria | Proteobacteria    | Gammaproteobacteria | 211ds20                            |
| 137           | Bacteria | Proteobacteria    | Gammaproteobacteria | AT-s2-59                           |
| 138           | Bacteria | Proteobacteria    | Gammaproteobacteria | Aeromonadales                      |
| 139           | Bacteria | Proteobacteria    | Gammaproteobacteria | Alteromonadales                    |
| 140           | Bacteria | Proteobacteria    | Gammaproteobacteria | B2M28                              |
| 141           | Bacteria | Proteobacteria    | Gammaproteobacteria | Burkholderiales                    |
| 142           | Bacteria | Proteobacteria    | Gammaproteobacteria | CCD24                              |
| 143           | Bacteria | Proteobacteria    | Gammaproteobacteria | CCM19a                             |
| 144           | Bacteria | Proteobacteria    | Gammaproteobacteria | Cellvibrionales                    |
| 145           | Bacteria | Proteobacteria    | Gammaproteobacteria | Diplorickettsiales                 |
| 146           | Bacteria | Proteobacteria    | Gammaproteobacteria | Enterobacterales                   |
| 147           | Bacteria | Proteobacteria    | Gammaproteobacteria | Ga0077536                          |
| 148           | Bacteria | Proteobacteria    | Gammaproteobacteria | Gammaproteobacteria_Incertae_Sedis |
| 149           | Bacteria | Proteobacteria    | Gammaproteobacteria | KF-JG30-C25                        |
| 150           | Bacteria | Proteobacteria    | Gammaproteobacteria | KI89A_clade                        |
| 151           | Bacteria | Proteobacteria    | Gammaproteobacteria | Legionellales                      |
| 152           | Bacteria | Proteobacteria    | Gammaproteobacteria | Methylococcales                    |
| 153           | Bacteria | Proteobacteria    | Gammaproteobacteria | Oceanospirillales                  |
| 154           | Bacteria | Proteobacteria    | Gammaproteobacteria | PLTA13                             |
| 155           | Bacteria | Proteobacteria    | Gammaproteobacteria | Pseudomonadales                    |
| 156           | Bacteria | Proteobacteria    | Gammaproteobacteria | R7C24                              |
| 157           | Bacteria | Proteobacteria    | Gammaproteobacteria | Steroidobacterales                 |
| 158           | Bacteria | Proteobacteria    | Gammaproteobacteria | Tenderiales                        |
| 159           | Bacteria | Proteobacteria    | Gammaproteobacteria | Thiotrichales                      |
| 160           | Bacteria | Proteobacteria    | Gammaproteobacteria | uncultured                         |
| 161           | Bacteria | Proteobacteria    | Gammaproteobacteria | Xanthomonadales                    |
| 162           | Bacteria | RCP2-54           | RCP2-54             | RCP2-54                            |
| 163           | Bacteria | Verrucomicrobiota | Omnitrophia         | Omnitrophales                      |
| 164           | Bacteria | Verrucomicrobiota | Verrucomicrobiae    | Chthoniobacterales                 |
| 165           | Bacteria | Verrucomicrobiota | Verrucomicrobiae    | Methylacidiphilales                |
| 166           | Bacteria | Verrucomicrobiota | Verrucomicrobiae    | Opitutales                         |
| 167           | Bacteria | Verrucomicrobiota | Verrucomicrobiae    | Pedosphaerales                     |

| OTU<br>number | Domain   | Phylum                | Class            | Order              |
|---------------|----------|-----------------------|------------------|--------------------|
| 168           | Bacteria | Verrucomicrobiot<br>a | Verrucomicrobiae | Verrucomicrobiales |
| 169           | Bacteria | Verrucomicrobiot<br>a | Verrucomicrobiae | uncultured         |
| 170           | Bacteria | WOR-1                 | WOR-1            | WOR-1              |

Table S5. List of OTUs corresponding to the numbering on Figures 3a, 4a and 5b.

| OTU number | Domain     | Phylum           | Class                                | Order                                | Family                               | Genus                                |
|------------|------------|------------------|--------------------------------------|--------------------------------------|--------------------------------------|--------------------------------------|
| 1          | Unassigned | —                | —                                    | —                                    | —                                    | —                                    |
| 2          | Archaea    | Aenigmarchaeota  | Aenigmarchaeia                       | Aenigmarchaeales                     | Aenigmarchaeales                     | Aenigmarchaeales                     |
| 3          | Archaea    | Aenigmarchaeota  | Deep_Sea_Euryarchaeotic_Group (DSEG) | Deep_Sea_Euryarchaeotic_Group (DSEG) | Deep_Sea_Euryarchaeotic_Group (DSEG) | Deep_Sea_Euryarchaeotic_Group (DSEG) |
| 4          | Archaea    | Crenarchaeota    | Bathyarchaeia                        | Bathyarchaeia                        | Bathyarchaeia                        | Bathyarchaeia                        |
| 5          | Archaea    | Crenarchaeota    | Nitrososphaeria                      | —                                    | —                                    | —                                    |
| 6          | Archaea    | Crenarchaeota    | Nitrososphaeria                      | Marine_Benthic_Group_A               | Marine_Benthic_Group_A               | Marine_Benthic_Group_A               |
| 7          | Archaea    | Crenarchaeota    | Nitrososphaeria                      | Nitrosopumilales                     | Nitrosopumilaceae                    | Nitrosarchaeum                       |
| 8          | Archaea    | Crenarchaeota    | Nitrososphaeria                      | Nitrosopumilales                     | Nitrosopumilaceae                    | Nitrosopumilaceae                    |
| 9          | Archaea    | Crenarchaeota    | Nitrososphaeria                      | Nitrosotaleales                      | Nitrosotaleaceae                     | Nitrosotaleaceae                     |
| 10         | Archaea    | Micrarchaeota    | Micrarchaeia                         | Micrarchaeales                       | CG1-02-32-21                         | CG1-02-32-21                         |
| 11         | Archaea    | Nanoarchaeota    | Nanoarchaeia                         | Woesearchaeales                      | —                                    | —                                    |
| 12         | Archaea    | Nanoarchaeota    | Nanoarchaeia                         | Woesearchaeales                      | GW2011_GWC1_47_15                    | GW2011_GWC1_47_15                    |
| 13         | Archaea    | Nanoarchaeota    | Nanoarchaeia                         | Woesearchaeales                      | SCGC_AAA011-D5                       | SCGC_AAA011-D5                       |
| 14         | Archaea    | Nanoarchaeota    | Nanoarchaeia                         | Woesearchaeales                      | Woesearchaeales                      | Woesearchaeales                      |
| 15         | Archaea    | Thermoplasmatota | Thermoplasmata                       | Methanomassiliicoccales              | uncultured                           | uncultured                           |
| 16         | Bacteria   | —                | —                                    | —                                    | —                                    | —                                    |
| 17         | Bacteria   | Acidobacteriota  | —                                    | —                                    | —                                    | —                                    |
| 18         | Bacteria   | Acidobacteriota  | Blastocatellia                       | Blastocatellales                     | Blastocatellaceae                    | Aridibacter                          |
| 19         | Bacteria   | Acidobacteriota  | Blastocatellia                       | Blastocatellales                     | Blastocatellaceae                    | JGI_0001001-H03                      |
| 20         | Bacteria   | Acidobacteriota  | Blastocatellia                       | Blastocatellales                     | Blastocatellaceae                    | uncultured                           |
| 21         | Bacteria   | Acidobacteriota  | Subgroup_22                          | Subgroup_22                          | Subgroup_22                          | Subgroup_22                          |
| 22         | Bacteria   | Acidobacteriota  | Subgroup_5                           | Subgroup_5                           | Subgroup_5                           | Subgroup_5                           |
| 23         | Bacteria   | Acidobacteriota  | Vicinamibacteria                     | Vicinamibacterales                   | Vicinamibacteraceae                  | Vicinamibacteraceae                  |
| 24         | Bacteria   | Acidobacteriota  | Vicinamibacteria                     | Vicinamibacterales                   | uncultured                           | uncultured                           |
| 25         | Bacteria   | Actinobacteriota | Actinobacteria                       | Corynebacteriales                    | Corynebacteriaceae                   | Corynebacterium                      |
| 26         | Bacteria   | Actinobacteriota | Actinobacteria                       | Corynebacteriales                    | Corynebacteriaceae                   | Lawsonella                           |
| 27         | Bacteria   | Actinobacteriota | Actinobacteria                       | Micrococcales                        | Micrococcaceae                       | Rothia                               |
| 28         | Bacteria   | Actinobacteriota | Actinobacteria                       | Propionibacteriales                  | Propionibacteriaceae                 | Cutibacterium                        |
| 29         | Bacteria   | Bacteroidota     | Bacteroidia                          | Flavobacteriales                     | Crocinitomicaceae                    | Fluviicola                           |

| OTU number | Domain   | Phylum           | Class                  | Order              | Family             | Genus                      |
|------------|----------|------------------|------------------------|--------------------|--------------------|----------------------------|
| 30         | Bacteria | Bacteroidota     | Bacteroidia            | Sphingobacteriales | AKYH767            | AKYH767                    |
| 31         | Bacteria | Bacteroidota     | Bacteroidia            | Sphingobacteriales | KD3-93             | KD3-93                     |
| 32         | Bacteria | Bacteroidota     | Bacteroidia            | Sphingobacteriales | env.OPS_17         | env.OPS_17                 |
| 33         | Bacteria | Bacteroidota     | Kryptonia              | Kryptoniales       | BSV26              | BSV26                      |
| 34         | Bacteria | Bdellovibrionota | Bdellovibrionia        | Bdellovibrionales  | Bdellovibrionaceae | Bdellovibrio               |
| 35         | Bacteria | Bdellovibrionota | Oligoflexia            | 0319-6G20          | 0319-6G20          | 0319-6G20                  |
| 36         | Bacteria | Campilobacterota | Campylobacteria        | Campylobacterales  | Sulfurimonadaceae  | Sulfuricurvum              |
| 37         | Bacteria | Chloroflexi      | Anaerolineae           | Anaerolineales     | Anaerolineaceae    | uncultured                 |
| 38         | Bacteria | Chloroflexi      | Anaerolineae           | RBG-13-54-9        | RBG-13-54-9        | RBG-13-54-9                |
| 39         | Bacteria | Chloroflexi      | Dehalococcoidia        | —                  | —                  | —                          |
| 40         | Bacteria | Chloroflexi      | Dehalococcoidia        | 661239             | 661239             | 661239                     |
| 41         | Bacteria | Chloroflexi      | Dehalococcoidia        | S085               | S085               | S085                       |
| 42         | Bacteria | Chloroflexi      | Dehalococcoidia        | SAR202_clade       | SAR202_clade       | SAR202_clade               |
| 43         | Bacteria | Cyanobacteria    | Vampirivibrionia       | Obscuribacterales  | Obscuribacteraceae | Candidatus_Obscuribacter   |
| 44         | Bacteria | DTB120           | DTB120                 | DTB120             | DTB120             | DTB120                     |
| 45         | Bacteria | Desulfobacterota | Desulfuromonadia       | —                  | —                  | —                          |
| 46         | Bacteria | Elusimicrobiota  | Elusimicrobia          | Lineage_IV         | Lineage_IV         | Lineage_IV                 |
| 47         | Bacteria | Elusimicrobiota  | Lineage_IIC            | Lineage_IIC        | Lineage_IIC        | Lineage_IIC                |
| 48         | Bacteria | Firmicutes       | Bacilli                | Lactobacillales    | Streptococcaceae   | Streptococcus              |
| 49         | Bacteria | Firmicutes       | Bacilli                | Staphylococcales   | Staphylococcaceae  | Staphylococcus             |
| 50         | Bacteria | Latescibacterota | Latescibacterota       | Latescibacterota   | Latescibacterota   | Latescibacterota           |
| 51         | Bacteria | MBNT15           | MBNT15                 | MBNT15             | MBNT15             | MBNT15                     |
| 52         | Bacteria | Methyloirabilota | Methyloirabilia        | Methyloirabiales   | Methyloirabilaceae | Candidatus_Methyloirabilis |
| 53         | Bacteria | Methyloirabilota | Methyloirabilia        | Methyloirabiales   | Methyloirabilaceae | MIZ17                      |
| 54         | Bacteria | Methyloirabilota | Methyloirabilia        | Methyloirabiales   | Methyloirabilaceae | Sh765B-TzT-35              |
| 55         | Bacteria | Methyloirabilota | Methyloirabilia        | Rokubacteriales    | Rokubacteriales    | Rokubacteriales            |
| 56         | Bacteria | Myxococcota      | Myxococcia             | Myxococcales       | Myxococcaceae      | P3OB-42                    |
| 57         | Bacteria | Myxococcota      | bacteriap25            | bacteriap25        | bacteriap25        | bacteriap25                |
| 58         | Bacteria | Nitrospirota     | —                      | —                  | —                  | —                          |
| 59         | Bacteria | Nitrospirota     | 4-29-1                 | 4-29-1             | 4-29-1             | 4-29-1                     |
| 60         | Bacteria | Nitrospirota     | Leptospirillia         | Leptospirillales   | Leptospirillaceae  | Leptospirillum             |
| 61         | Bacteria | Nitrospirota     | Nitrospira             | Nitrospirales      | Nitrospiraceae     | Nitrospira                 |
| 62         | Bacteria | Nitrospirota     | Thermodesulfovibrionia | uncultured         | uncultured         | uncultured                 |



| OTU<br>number | Domain   | Phylum          | Class               | Order                    | Family                     | Genus                              |
|---------------|----------|-----------------|---------------------|--------------------------|----------------------------|------------------------------------|
| 63            | Bacteria | Patescibacteria | Berkelbacteria      | Berkelbacteria           | Berkelbacteria             | Berkelbacteria                     |
| 64            | Bacteria | Patescibacteria | Gracilibacteria     | Candidatus_Peribacteria  | Candidatus_Peribacteria    | Candidatus_Peribacteria            |
| 65            | Bacteria | Patescibacteria | Gracilibacteria     | Gracilibacteria          | Gracilibacteria            | Gracilibacteria                    |
| 66            | Bacteria | Patescibacteria | Kazania             | Kazania                  | Kazania                    | Kazania                            |
| 67            | Bacteria | Patescibacteria | Parcubacteria       | —                        | —                          | —                                  |
| 68            | Bacteria | Patescibacteria | Parcubacteria       | Candidatus_Adlerbacteria | Candidatus_Adlerbacteria   | Candidatus_Adlerbacteria           |
| 69            | Bacteria | Patescibacteria | Parcubacteria       | Candidatus_Azambacteria  | Candidatus_Azambacteria    | Candidatus_Azambacteria            |
| 70            | Bacteria | Patescibacteria | Parcubacteria       | Parcubacteria            | Parcubacteria              | Parcubacteria                      |
| 71            | Bacteria | Patescibacteria | Parcubacteria       | UBA9983                  | UBA9983                    | UBA9983                            |
| 72            | Bacteria | Patescibacteria | Saccharimonadia     | Saccharimonadales        | —                          | —                                  |
| 73            | Bacteria | Planctomycetota | Phycisphaerae       | CCM11a                   | CCM11a                     | CCM11a                             |
| 74            | Bacteria | Planctomycetota | Pla4_lineage        | Pla4_lineage             | Pla4_lineage               | Pla4_lineage                       |
| 75            | Bacteria | Proteobacteria  | Alphaproteobacteria | Azospirillales           | Azospirillaceae            | Skermanella                        |
| 76            | Bacteria | Proteobacteria  | Alphaproteobacteria | Caulobacterales          | Caulobacteraceae           | Brevundimonas                      |
| 77            | Bacteria | Proteobacteria  | Alphaproteobacteria | Caulobacterales          | Hyphomonadaceae            | —                                  |
| 78            | Bacteria | Proteobacteria  | Alphaproteobacteria | Caulobacterales          | Parvularculaceae           | Amphiplicatus                      |
| 79            | Bacteria | Proteobacteria  | Alphaproteobacteria | Dongiales                | Dongiaceae                 | Dongia                             |
| 80            | Bacteria | Proteobacteria  | Alphaproteobacteria | Paracaedibacterales      | Paracaedibacteraceae       | Candidatus_Paracaedibacter         |
| 81            | Bacteria | Proteobacteria  | Alphaproteobacteria | Reyranellales            | Reyranellaceae             | Reyranella                         |
| 82            | Bacteria | Proteobacteria  | Alphaproteobacteria | Rhizobiales              | Beijerinckiaceae           | Bosea                              |
| 83            | Bacteria | Proteobacteria  | Alphaproteobacteria | Rhizobiales              | Beijerinckiaceae           | Methylobacterium-<br>Methylorubrum |
| 84            | Bacteria | Proteobacteria  | Alphaproteobacteria | Rhizobiales              | Beijerinckiaceae           | Microvirga                         |
| 85            | Bacteria | Proteobacteria  | Alphaproteobacteria | Rhizobiales              | Beijerinckiaceae           | alphaI_cluster                     |
| 86            | Bacteria | Proteobacteria  | Alphaproteobacteria | Rhizobiales              | Hyphomicrobiaceae          | Hyphomicrobium                     |
| 87            | Bacteria | Proteobacteria  | Alphaproteobacteria | Rhizobiales              | Hyphomicrobiaceae          | Pedomicrobium                      |
| 88            | Bacteria | Proteobacteria  | Alphaproteobacteria | Rhizobiales              | Hyphomicrobiaceae          | uncultured                         |
| 89            | Bacteria | Proteobacteria  | Alphaproteobacteria | Rhizobiales              | Rhizobiales_Incertae_Sedis | Phreatobacter                      |
| 90            | Bacteria | Proteobacteria  | Alphaproteobacteria | Rhizobiales              | Xanthobacteraceae          | uncultured                         |
| 91            | Bacteria | Proteobacteria  | Alphaproteobacteria | Rhodobacterales          | Rhodobacteraceae           | —                                  |
| 92            | Bacteria | Proteobacteria  | Alphaproteobacteria | Sphingomonadales         | Sphingomonadaceae          | —                                  |
| 93            | Bacteria | Proteobacteria  | Alphaproteobacteria | Sphingomonadales         | Sphingomonadaceae          | Novosphingobium                    |
| 94            | Bacteria | Proteobacteria  | Alphaproteobacteria | Sphingomonadales         | Sphingomonadaceae          | Rhizorhapis                        |

| OTU<br>number | Domain   | Phylum         | Class               | Order                | Family                | Genus                |
|---------------|----------|----------------|---------------------|----------------------|-----------------------|----------------------|
| 95            | Bacteria | Proteobacteria | Alphaproteobacteria | Sphingomonadales     | Sphingomonadaceae     | Sphingobium          |
| 96            | Bacteria | Proteobacteria | Alphaproteobacteria | Sphingomonadales     | Sphingomonadaceae     | Sphingomonas         |
| 97            | Bacteria | Proteobacteria | Alphaproteobacteria | Sphingomonadales     | Sphingomonadaceae     | Sphingopyxis         |
| 98            | Bacteria | Proteobacteria | Alphaproteobacteria | Sphingomonadales     | Sphingomonadaceae     | Sphingorhabdus       |
| 99            | Bacteria | Proteobacteria | Alphaproteobacteria | Zavarziniales        | uncultured            | uncultured           |
| 100           | Bacteria | Proteobacteria | Alphaproteobacteria | uncultured           | uncultured            | uncultured           |
| 101           | Bacteria | Proteobacteria | Gammaproteobacteria | Acidiferrobacterales | Acidiferrobacteraceae | —                    |
| 102           | Bacteria | Proteobacteria | Gammaproteobacteria | Acidiferrobacterales | Acidiferrobacteraceae | Sulfurifustis        |
| 103           | Bacteria | Proteobacteria | Gammaproteobacteria | B2M28                | B2M28                 | B2M28                |
| 104           | Bacteria | Proteobacteria | Gammaproteobacteria | Burkholderiales      | Comamonadaceae        | —                    |
| 105           | Bacteria | Proteobacteria | Gammaproteobacteria | Burkholderiales      | Comamonadaceae        | Aquabacterium        |
| 106           | Bacteria | Proteobacteria | Gammaproteobacteria | Burkholderiales      | Comamonadaceae        | Rhizobacter          |
| 107           | Bacteria | Proteobacteria | Gammaproteobacteria | Burkholderiales      | Comamonadaceae        | Rhodoferax           |
| 108           | Bacteria | Proteobacteria | Gammaproteobacteria | Burkholderiales      | Gallionellaceae       | —                    |
| 109           | Bacteria | Proteobacteria | Gammaproteobacteria | Burkholderiales      | Gallionellaceae       | Candidatus_Nitrotoga |
| 110           | Bacteria | Proteobacteria | Gammaproteobacteria | Burkholderiales      | Gallionellaceae       | Ferriphaselus        |
| 111           | Bacteria | Proteobacteria | Gammaproteobacteria | Burkholderiales      | Gallionellaceae       | Gallionella          |
| 112           | Bacteria | Proteobacteria | Gammaproteobacteria | Burkholderiales      | Gallionellaceae       | Sideroxydans         |
| 113           | Bacteria | Proteobacteria | Gammaproteobacteria | Burkholderiales      | Gallionellaceae       | uncultured           |
| 114           | Bacteria | Proteobacteria | Gammaproteobacteria | Burkholderiales      | Leeiaceae             | Leeia                |
| 115           | Bacteria | Proteobacteria | Gammaproteobacteria | Burkholderiales      | Nitrosomonadaceae     | GOUTA6               |
| 116           | Bacteria | Proteobacteria | Gammaproteobacteria | Burkholderiales      | Nitrosomonadaceae     | IS-44                |
| 117           | Bacteria | Proteobacteria | Gammaproteobacteria | Burkholderiales      | Nitrosomonadaceae     | Nitrosomonas         |
| 118           | Bacteria | Proteobacteria | Gammaproteobacteria | Burkholderiales      | Nitrosomonadaceae     | Nitrosospira         |
| 119           | Bacteria | Proteobacteria | Gammaproteobacteria | Burkholderiales      | Oxalobacteraceae      | Herminiimonas        |
| 120           | Bacteria | Proteobacteria | Gammaproteobacteria | Burkholderiales      | Oxalobacteraceae      | Massilia             |
| 121           | Bacteria | Proteobacteria | Gammaproteobacteria | Burkholderiales      | Oxalobacteraceae      | Undibacterium        |
| 122           | Bacteria | Proteobacteria | Gammaproteobacteria | Burkholderiales      | Rhodocyclaceae        | Dechloromonas        |
| 123           | Bacteria | Proteobacteria | Gammaproteobacteria | Burkholderiales      | Rhodocyclaceae        | Ferribacterium       |
| 124           | Bacteria | Proteobacteria | Gammaproteobacteria | Burkholderiales      | Sulfuricellaceae      | Sulfuricella         |
| 125           | Bacteria | Proteobacteria | Gammaproteobacteria | Burkholderiales      | TRA3-20               | TRA3-20              |
| 126           | Bacteria | Proteobacteria | Gammaproteobacteria | Enterobacterales     | Enterobacteriaceae    | Escherichia-Shigella |
| 127           | Bacteria | Proteobacteria | Gammaproteobacteria | Methylococcales      | Methyломonadaceae     | Crenothrix           |

| OTU<br>number | Domain   | Phylum            | Class               | Order              | Family              | Genus                  |
|---------------|----------|-------------------|---------------------|--------------------|---------------------|------------------------|
| 128           | Bacteria | Proteobacteria    | Gammaproteobacteria | Methylococcales    | Methylomonadaceae   | Methylobacter          |
| 129           | Bacteria | Proteobacteria    | Gammaproteobacteria | Pseudomonadales    | Moraxellaceae       | Acinetobacter          |
| 130           | Bacteria | Proteobacteria    | Gammaproteobacteria | Pseudomonadales    | Moraxellaceae       | Enhydrobacter          |
| 131           | Bacteria | Proteobacteria    | Gammaproteobacteria | Pseudomonadales    | Moraxellaceae       | Perlucidibaca          |
| 132           | Bacteria | Proteobacteria    | Gammaproteobacteria | Pseudomonadales    | Pseudomonadaceae    | Pseudomonas            |
| 133           | Bacteria | Proteobacteria    | Gammaproteobacteria | Tenderiales        | Tenderiaceae        | Candidatus_Tenderia    |
| 134           | Bacteria | Proteobacteria    | Gammaproteobacteria | Thiotrichales      | Thiotrichaceae      | Thiothrix              |
| 135           | Bacteria | Proteobacteria    | Gammaproteobacteria | uncultured         | uncultured          | uncultured             |
| 136           | Bacteria | RCP2-54           | RCP2-54             | RCP2-54            | RCP2-54             | RCP2-54                |
| 137           | Bacteria | Verrucomicrobiota | Omnitrophia         | Omnitrophales      | Omnitrophaceae      | Candidatus_Omnitrophus |
| 138           | Bacteria | Verrucomicrobiota | Verrucomicrobiae    | Chthoniobacterales | Chthoniobacteraceae | Chthoniobacter         |
| 139           | Bacteria | Verrucomicrobiota | Verrucomicrobiae    | Opitutales         | Opitutaceae         | Opitutus               |
| 140           | Bacteria | Verrucomicrobiota | Verrucomicrobiae    | Pedosphaerales     | Pedosphaeraceae     | uncultured             |
| 141           | Bacteria | WOR-1             | WOR-1               | WOR-1              | WOR-1               | WOR-1                  |

Figure S1. Diversity indexes. a) PCoA biplot of the weighted unifracs distances of the samples (beta diversity) b) Rarefaction curves in terms of the observed features as function of the sequencing depth (alpha diversity)

a)

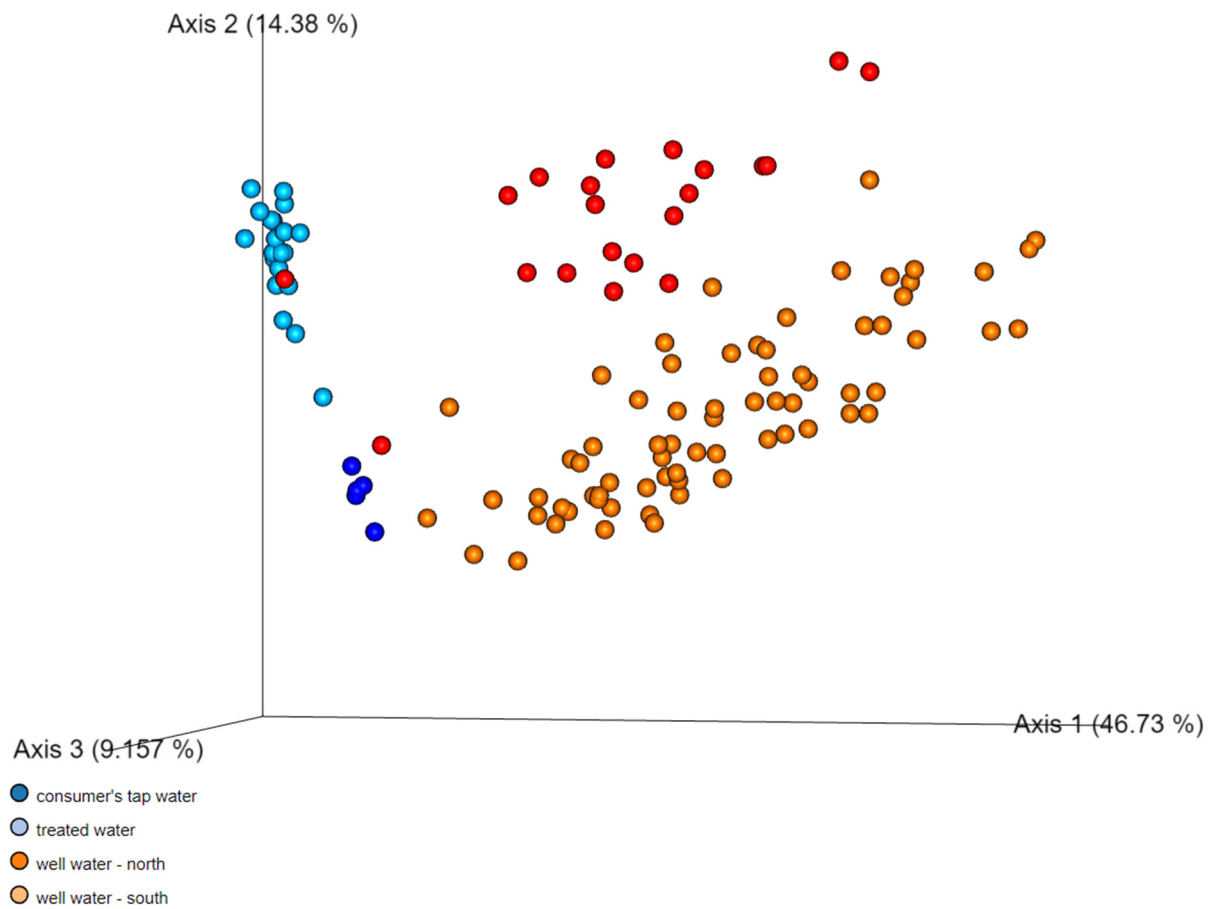

b)

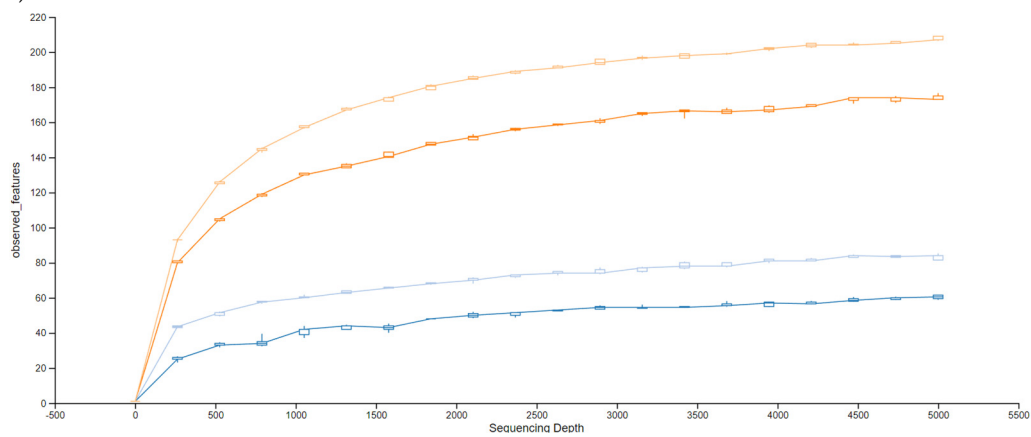

Figure S2. Seasonal variation of microbial community in the Southern wells. a) Visualization of relative abundance of sequences at phylum level. Phyla with abundance below 1% are indicated as “other”. b) Visualization of relative abundance of sequences at order level. Orders with abundance below 1% are indicated as “other”.

a)

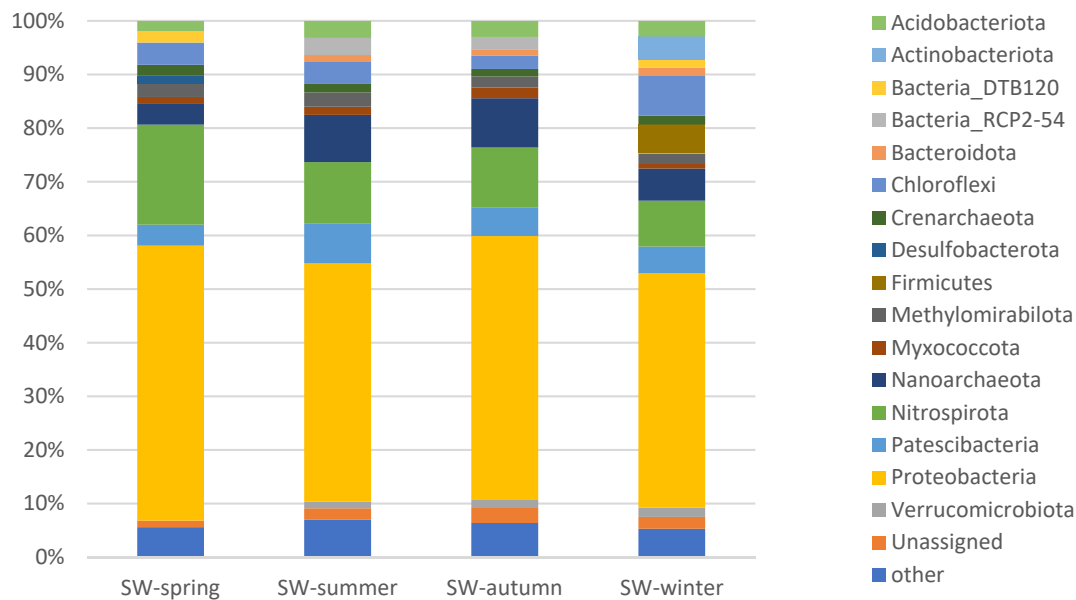

b)

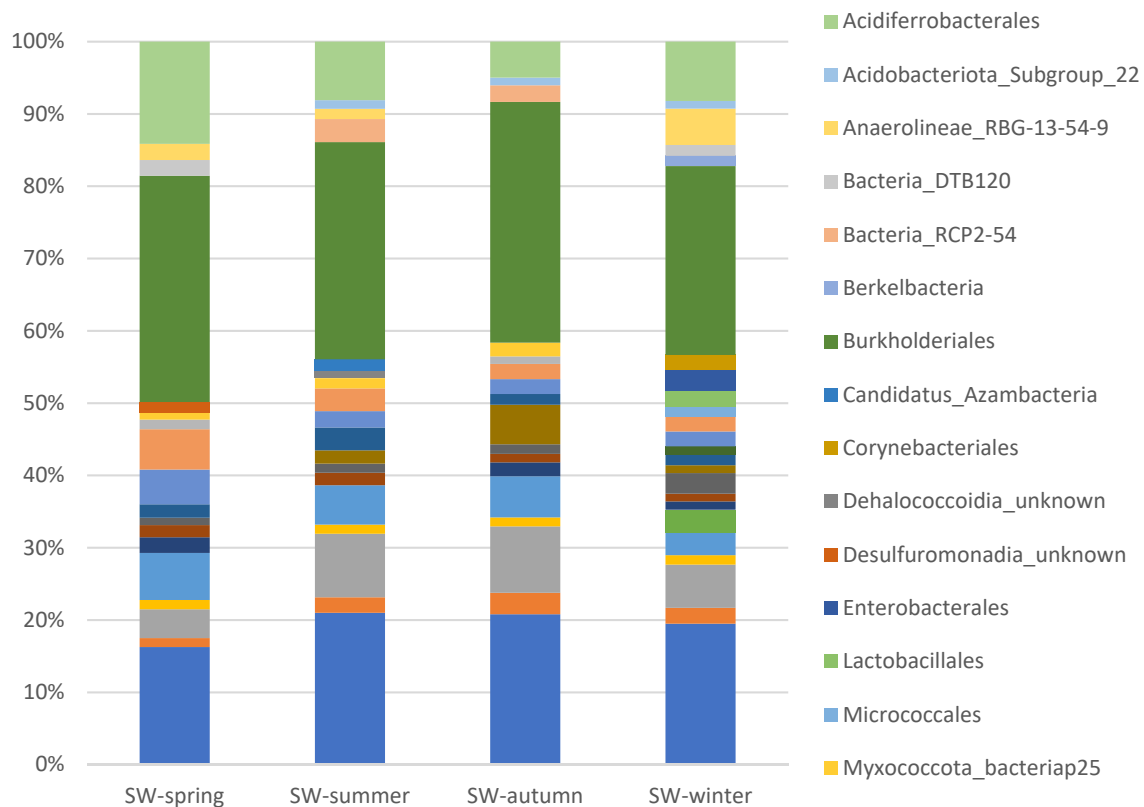

Table S6. Microbial community structure comparison of river water (NR1-3 and SR1-3) well waters and treated water samples. Relative abundances of sequences at phylum level. Phyla with abundance below 1% are indicated as “other”.

| Phylum            | Danube river | well water | treated water |
|-------------------|--------------|------------|---------------|
| Acidobacteriota   |              | 3,77       | 6,80          |
| Actinobacteriota  | 19,27        | 1,43       | 2,07          |
| Bacteria_DTB120   |              | 1,09       |               |
| Bacteria_RCP2-54  |              | 1,86       |               |
| Bacteroidota      | 21,73        | 1,68       |               |
| Bdellovibrionota  |              |            | 5,10          |
| Chloroflexi       |              | 3,84       |               |
| Crenarchaeota     |              | 1,94       |               |
| Cyanobacteria     |              |            | 1,45          |
| Firmicutes        |              | 1,69       | 3,93          |
| Methyloirabiolota |              | 3,27       |               |
| Myxococcota       |              | 2,76       |               |
| Nanoarchaeota     |              | 6,75       |               |
| Nitrospirota      |              | 10,79      | 4,15          |
| Patescibacteria   |              | 4,62       |               |
| Proteobacteria    | 50,03        | 45,96      | 75,64         |
| Verrucomicrobiota | 7,33         | 1,25       |               |
| Unassigned        |              | 2,07       |               |
| other             | 1,65         | 5,23       | 0,87          |

Table S7. Microbial community structure comparison of river water (NR1-3 and SR1-3) well waters and treated water samples. Relative abundances of sequences at order level. Orders with abundance below 1% are indicated as “other”.

| Order                             | Danube river | well water | treated water |
|-----------------------------------|--------------|------------|---------------|
| Acidiferrobacterales              |              | 6,78       |               |
| Alphaproteobacteria_SAR11_clade   | 1,82         |            |               |
| Alphaproteobacteria_uncultured    |              |            | 5,47          |
| Anaerolineae_RBG-13-54-9          |              | 1,82       |               |
| Bacteria_DTB120                   |              | 1,09       |               |
| Bacteria_RCP2-54                  |              | 1,86       |               |
| Bdellovibrionales                 |              |            | 5,10          |
| Berkelbacteria                    |              | 1,05       |               |
| Blastocatellales                  |              |            | 6,75          |
| Burkholderiales                   | 37,85        | 27,12      | 32,24         |
| Caulobacterales                   |              |            | 3,87          |
| Chitinophagales                   | 4,82         |            |               |
| Cytophagales                      | 6,02         |            |               |
| Enterobacterales                  |              | 1,04       | 1,72          |
| Flavobacteriales                  | 6,71         |            |               |
| Frankiales                        | 15,50        |            |               |
| Methylococcales                   |              |            | 1,03          |
| Methylospirales                   |              | 1,48       |               |
| Micrococcales                     | 1,45         |            |               |
| Microtrichales                    | 2,25         |            |               |
| Myxococcota_bacteriap25           |              | 2,50       |               |
| Nitrospirales                     |              | 2,20       | 4,07          |
| Nitrospirota_4-29-1               |              | 2,29       |               |
| Nitrospirota_unknown              |              | 2,09       |               |
| Obscuribacterales                 |              |            | 1,45          |
| Parcubacteria_unknown             |              | 1,48       |               |
| Pseudomonadales                   | 3,67         | 2,57       | 4,01          |
| Reyranellales                     |              |            | 2,79          |
| Rhizobiales                       |              | 3,68       | 10,71         |
| Rhodobacterales                   |              |            | 1,13          |
| Rokubacterales                    |              | 1,79       |               |
| Sphingobacteriales                | 3,99         | 1,13       |               |
| Sphingomonadales                  | 2,86         | 2,30       | 10,67         |
| Staphylococcales                  |              | 1,08       | 3,07          |
| Thermodesulfovibrionia_uncultured |              | 3,88       |               |
| Verrucomicrobiae_uncultured       | 4,53         |            |               |
| Verrucomicrobiales                | 1,22         |            |               |
| Vicinamibacterales                |              | 2,06       |               |
| Woesearchaeales                   |              | 6,75       |               |
| Unassigned                        |              | 2,07       |               |
| other                             | 7,31         | 19,88      | 5,94          |

Table S8. Microbial community structure comparison of Northern wells (NW2, NW3, NWM) and Southern wells (SW1, SW2, SW3, SWM). Relative abundance of sequences at phylum level. Phyla with abundance below 1% are indicated as “other”.

| Phylum            | North well | South well |
|-------------------|------------|------------|
| Acidobacteriota   | 6,92       | 2,77       |
| Actinobacteriota  |            | 1,62       |
| Bacteria_DTB120   |            | 1,36       |
| Bacteria_RCP2-54  | 3,06       | 1,48       |
| Bacteria_WOR-1    | 1,58       |            |
| Bacteroidota      | 3,30       | 1,17       |
| Bdellovibrionota  | 1,54       |            |
| Chloroflexi       | 2,04       | 4,57       |
| Crenarchaeota     | 2,71       | 1,65       |
| Firmicutes        | 1,35       | 1,79       |
| Methyloirabilota  | 7,55       | 2,13       |
| Myxococcota       | 6,88       | 1,46       |
| Nanoarchaeota     | 5,49       | 7,01       |
| Nitrospirota      | 6,28       | 11,95      |
| Patescibacteria   | 2,84       | 5,11       |
| Proteobacteria    | 42,52      | 47,35      |
| Unassigned        | 1,39       | 2,27       |
| Verrucomicrobiota |            | 1,37       |
| other             | 4,55       | 4,95       |



Table S9. Microbial community structure comparison of Northern wells (NW2, NW3, NWM) and Southern wells (SW1, SW2, SW3, SWM). Relative abundance of sequences at order level. Orders with abundance below 1% are indicated as “other”.

| Order                             | North well | South well |
|-----------------------------------|------------|------------|
| Acidiferrobacterales              |            | 8,27       |
| Acidobacteriota_Subgroup_5        | 1,12       |            |
| Anaerolineae_RBG-13-54-9          |            | 2,46       |
| Azospirillales                    | 1,31       |            |
| Bacteria_DTB120                   |            | 1,36       |
| Bacteria_RCP2-54                  | 3,06       | 1,48       |
| Bacteria_WOR-1                    | 1,58       |            |
| Berkelbacteria                    | 1,16       | 1,00       |
| Burkholderiales                   | 17,65      | 30,23      |
| Dehalococcoidia_SAR202_clade      | 1,02       |            |
| Enterobacterales                  | 1,25       |            |
| Methylomirabilales                | 3,55       |            |
| Myxococcota_bacteriap25           | 6,21       | 1,34       |
| Nitrososphaeria_unknown           | 1,30       |            |
| Nitrospirales                     | 6,18       |            |
| Nitrospirota_4-29-1               |            | 2,92       |
| Nitrospirota_unknown              |            | 2,66       |
| Parcubacteria_unknown             |            | 1,73       |
| Pseudomonadales                   | 2,60       | 2,56       |
| Rhizobiales                       | 9,84       | 1,75       |
| Rokubacterales                    | 4,00       | 1,30       |
| Sphingobacterales                 | 2,52       |            |
| Sphingomonadales                  | 5,80       | 1,62       |
| Staphylococcales                  | 1,15       | 1,05       |
| Tenderiales                       | 2,24       |            |
| Thermodesulfovibrionia_uncultured |            | 5,00       |
| Unassigned                        | 1,39       | 2,27       |
| Vicinamibacterales                | 4,56       | 1,27       |
| Woesearchaeales                   | 5,49       | 7,01       |
| other                             | 14,99      | 22,70      |

Table S10. Microbial community structure comparison of Southern wells, during water treatment and in the supply system. Relative abundance of sequences at phylum level. Phyla with abundance below 1% are indicated as “other”.

| Phylum            | South well | water<br>treatment | supply<br>system |
|-------------------|------------|--------------------|------------------|
| Acidobacteriota   | 2,77       | 9,34               |                  |
| Actinobacteriota  | 1,62       | 1,61               |                  |
| Bacteria_DTB120   | 1,36       |                    |                  |
| Bacteria_RCP2-54  | 1,48       |                    |                  |
| Bacteroidota      | 1,17       |                    |                  |
| Bdellovibrionota  |            | 7,21               |                  |
| Chloroflexi       | 4,57       |                    |                  |
| Crenarchaeota     | 1,65       |                    |                  |
| Cyanobacteria     |            | 1,93               |                  |
| Firmicutes        | 1,79       | 3,21               |                  |
| Methyloirabilota  | 2,13       |                    |                  |
| Myxococcota       | 1,46       |                    |                  |
| Nanoarchaeota     | 7,01       |                    |                  |
| Nitrospirota      | 11,95      | 5,68               |                  |
| Patescibacteria   | 5,11       |                    |                  |
| Proteobacteria    | 47,35      | 69,82              | 98,23            |
| Unassigned        | 2,27       |                    |                  |
| Verrucomicrobiota | 1,37       |                    |                  |
| other             | 4,95       | 1,20               | 1,77             |

Table S11. Microbial community structure comparison of Southern wells, during water treatment and in the supply system. Relative abundance of sequences at order level. Orders with abundance below 1% are indicated as “other”.

| Order                             | South well | water treatment | supply system |
|-----------------------------------|------------|-----------------|---------------|
| Acidiferrobacterales              | 8,27       |                 | 2,61          |
| Alphaproteobacteria_uncultured    |            | 7,43            |               |
| Anaerolineae_RBG-13-54-9          | 2,46       |                 |               |
| Bacteria_DTB120                   | 1,36       |                 |               |
| Bacteria_RCP2-54                  | 1,48       |                 |               |
| Bdellovibrionales                 |            | 7,21            |               |
| Berkelbacteria                    | 1,00       |                 |               |
| Blastocatellales                  |            | 9,27            |               |
| Burkholderiales                   | 30,23      | 21,72           | 80,11         |
| Caulobacterales                   |            | 4,88            |               |
| Enterobacterales                  |            | 1,02            |               |
| Methylococcales                   |            | 1,42            |               |
| Myxococcota_bacteriap25           | 1,34       |                 |               |
| Nitrospirales                     |            | 5,57            |               |
| Nitrospirota_4-29-1               | 2,92       |                 |               |
| Nitrospirota_unknown              | 2,66       |                 |               |
| Obscuribacterales                 |            | 1,93            |               |
| Parcubacteria_unknown             | 1,73       |                 |               |
| Pseudomonadales                   | 2,56       |                 |               |
| Reyranellales                     |            | 3,51            | 1,07          |
| Rhizobiales                       | 1,75       | 11,12           | 11,30         |
| Rhodobacterales                   |            | 1,56            |               |
| Rokubacterales                    | 1,30       |                 |               |
| Sphingomonadales                  | 1,62       | 14,16           | 1,27          |
| Staphylococcales                  | 1,05       | 2,42            |               |
| Thermodesulfovibrionia_uncultured | 5,00       |                 |               |
| Unassigned                        | 2,27       |                 |               |
| Vicinamibacterales                | 1,27       |                 |               |
| Woesearchaeales                   | 7,01       |                 |               |
| other                             | 22,70      | 6,80            | 3,63          |
